# Supplementary material
Source: PubMed Central journal article supplement (PMC3260131)
Supplement: supp_djr499_DJR499_jnci-JNCI-11-0571-s01.pdf [file supp_djr499_DJR499_jnci-JNCI-11-0571-s01.pdf]

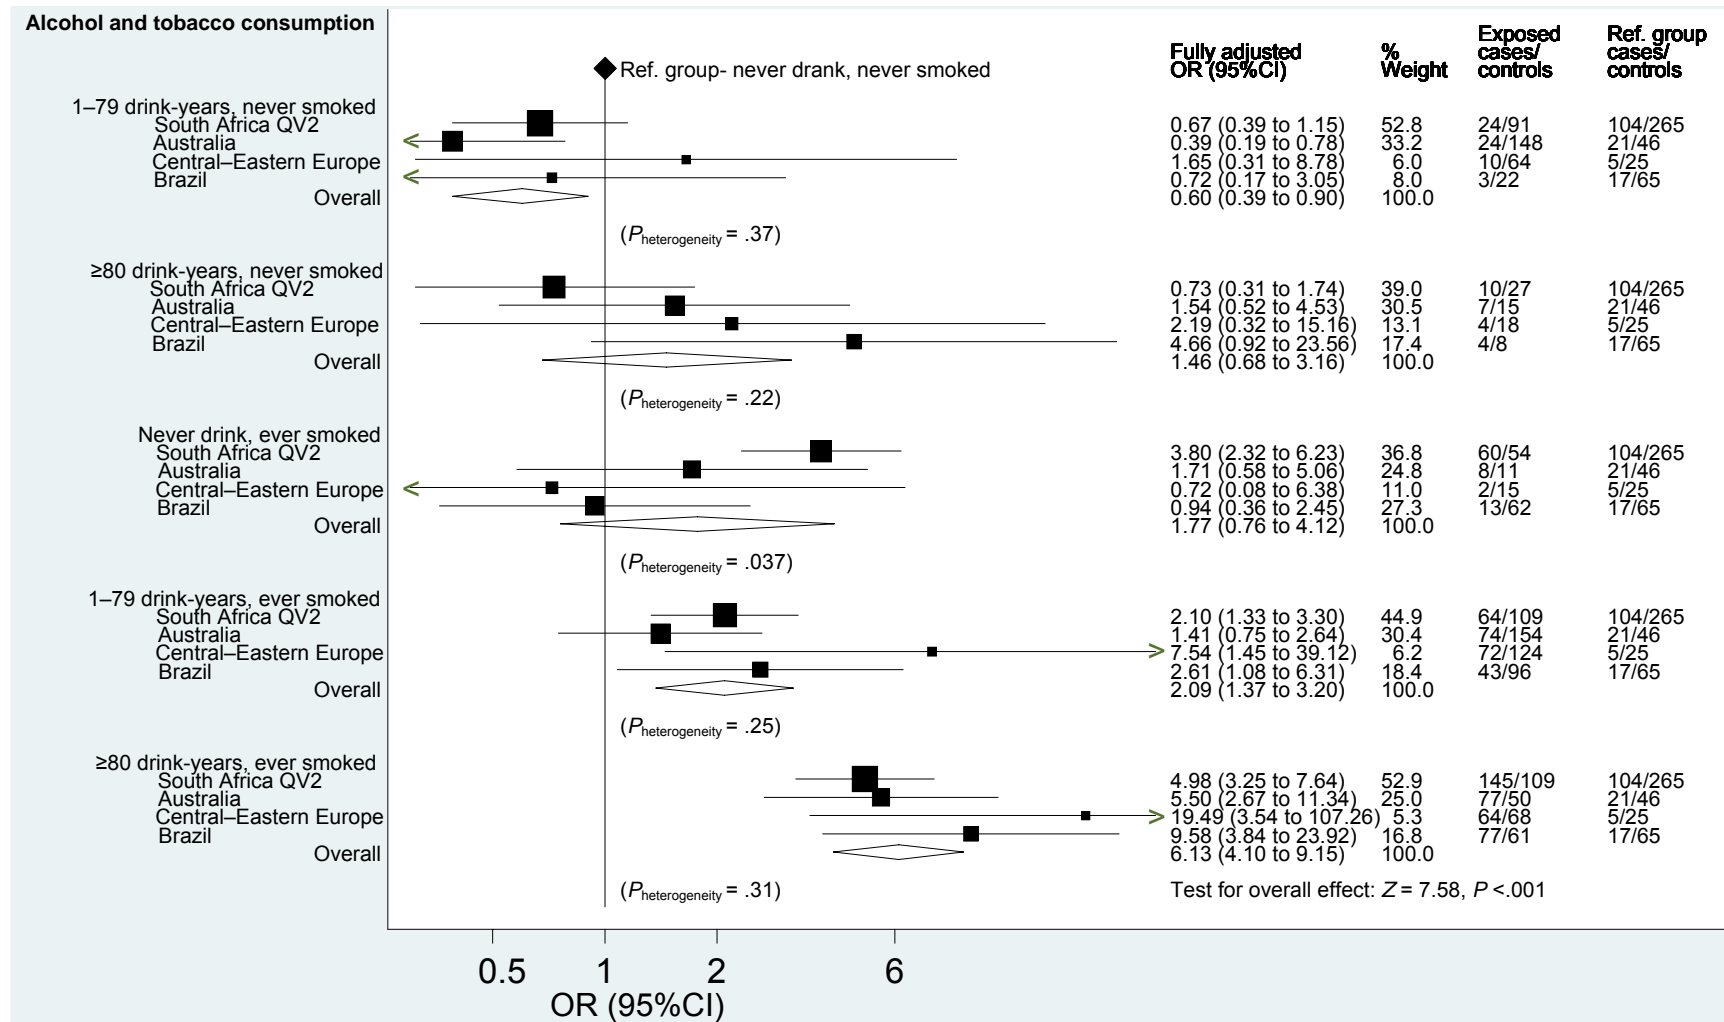

**Supplementary Figure 1.** Study-specific and pooled fully adjusted odds ratios for esophageal squamous cell carcinoma by tobacco smoking (ever or never smoked) and cumulative lifetime consumption of alcohol. One drink corresponds to 15.7 g of alcohol; China, Iran and participants who responded to questionnaire version one in the South African study were excluded from this analysis due to insufficient data on alcohol exposure levels.  $P_{\text{heterogeneity}} < .05$  indicates statistically significant heterogeneity among studies. OR = odds ratio; CI = confidence interval; QV2 = questionnaire version 2; ref = referent. Black squares represent study-specific odds ratios with square sizes proportional to the statistical weight of the study, white diamonds represent pooled odds ratios, horizontal lines and white diamond horizontal lengths represent 95% confidence intervals, and the vertical line and black diamond represent the “never drank, never smoked” referent group odds ratio of unity.
