# Supplementary material
Source: PubMed Central journal article supplement (PMC3260131)
Supplement: supp_djr499_DJR499_jnci-JNCI-11-0571-s02.pdf [file supp_djr499_DJR499_jnci-JNCI-11-0571-s02.pdf]

**Supplementary Table 1.** Study-specific and pooled fully adjusted odds ratios for the associations between serological markers and esophageal squamous cell carcinoma\*

| Marker and study           | No. of seropositive case subjects/<br>Total no. of case subjects (%) | No. of seropositive control subjects/<br>Total no. of control subjects (%) | Fully adjusted OR (95% CI) | % Weight | <i>P</i> | <i>P</i> <sub>heterogeneity</sub> † |
|----------------------------|----------------------------------------------------------------------|----------------------------------------------------------------------------|----------------------------|----------|----------|-------------------------------------|
| <b>HPV16 L1</b>            |                                                                      |                                                                            |                            |          |          |                                     |
| South Africa               | 146/697 (21.0)                                                       | 210/1110 (18.9)                                                            | 1.20 (0.92 to 1.55)        | 63.2     | .18      |                                     |
| Australia                  | 17/211 (8.1)                                                         | 22/424 (5.2)                                                               | 1.89 (0.92 to 3.89)        | 8.3      | .085     |                                     |
| Central and Eastern Europe | 7/157 (4.5)                                                          | 24/314 (7.6)                                                               | 0.45 (0.15 to 1.32)        | 3.8      | .15      |                                     |
| Brazil                     | 17/157 (10.8)                                                        | 36/314 (11.5)                                                              | 0.95 (0.44 to 2.03)        | 7.4      | .89      |                                     |
| Iran                       | 38/220 (17.3)                                                        | 29/221 (13.1)                                                              | 1.60 (0.88 to 2.92)        | 12.0     | .13      |                                     |
| China                      | 10/119 (8.4)                                                         | 12/119 (10.1)                                                              | 0.84 (0.34 to 2.07)        | 5.3      | .70      |                                     |
| Overall                    | 235/1561 (15.1)                                                      | 333/2502 (13.3)                                                            | 1.20 (0.97 to 1.47)        | 100.0    | .092     | .26                                 |
| <b>HPV16 E6</b>            |                                                                      |                                                                            |                            |          |          |                                     |
| South Africa               | 16/697 (2.3)                                                         | 16/1110 (1.4)                                                              | 1.81 (0.85 to 3.89)        | 52.4     | .13      |                                     |
| Australia                  | 9/211 (4.3)                                                          | 5/424 (1.2)                                                                | 3.26 (0.95 to 11.17)       | 20.2     | .060     |                                     |
| Central and Eastern Europe | 1/157 (0.6)                                                          | 7/314 (2.2)                                                                | 0.76 (0.08 to 6.96)        | 6.2      | .81      |                                     |
| Brazil                     | 3/157 (1.9)                                                          | 7/314 (2.2)                                                                | 0.77 (0.13 to 4.57)        | 9.7      | .78      |                                     |
| Iran                       | 4/220 (1.8)                                                          | 2/221 (0.9)                                                                | 5.35 (0.73 to 39.14)       | 7.7      | .099     |                                     |
| China                      | 1/119 (0.8)                                                          | 1/119 (0.8)                                                                | 1.04 (0.06 to 17.61)       | 3.8      | .98      |                                     |
| Overall                    | 34/1561 (2.2)                                                        | 38/2502 (1.5)                                                              | 1.89 (1.09 to 3.29)        | 100.0    | .023     | .61                                 |
| <b>HPV16 E7</b>            |                                                                      |                                                                            |                            |          |          |                                     |
| South Africa               | 9/697 (1.3)                                                          | 24/1110 (2.2)                                                              | 0.56 (0.24 to 1.31)        | 46.7     | .18      |                                     |
| Australia                  | 3/211 (1.4)                                                          | 5/424 (1.2)                                                                | 1.45 (0.30 to 7.10)        | 13.5     | .64      |                                     |
| Central and Eastern Europe | 4/157 (2.5)                                                          | 5/314 (1.6)                                                                | 2.43 (0.51 to 11.62)       | 13.8     | .27      |                                     |
| Brazil                     | 2/157 (1.3)                                                          | 11/314 (3.5)                                                               | 0.36 (0.07 to 1.94)        | 12.1     | .24      |                                     |
| Iran                       | 3/220 (1.4)                                                          | 3/221 (1.4)                                                                | 0.57 (0.10 to 3.26)        | 11.0     | .52      |                                     |
| China                      | 3/119 (2.5)                                                          | 1/119 (0.8)                                                                | 16.73 (0.55 to 512.24)     | 2.9      | .11      |                                     |
| Overall                    | 24/1561 (1.5)                                                        | 49/2502 (2.0)                                                              | 0.82 (0.46 to 1.46)        | 100.0    | .50      | .21                                 |
| <b>HPV16 E6 and/or E7</b>  |                                                                      |                                                                            |                            |          |          |                                     |
| South Africa               | 23/697 (3.3)                                                         | 40/1110 (3.6)                                                              | 0.94 (0.53 to 1.66)        | 49.9     | .83      |                                     |
| Australia                  | 11/211 (5.2)                                                         | 10/424 (2.4)                                                               | 2.24 (0.85 to 5.92)        | 17.3     | .10      |                                     |
| Central and Eastern Europe | 5/157 (3.2)                                                          | 11/314 (3.5)                                                               | 1.69 (0.49 to 5.81)        | 10.6     | .41      |                                     |
| Brazil                     | 4/157 (2.5)                                                          | 17/314 (5.4)                                                               | 0.35 (0.09 to 1.27)        | 9.6      | .11      |                                     |
| Iran                       | 7/220 (3.2)                                                          | 5/221 (2.3)                                                                | 1.60 (0.43 to 6.00)        | 9.3      | .49      |                                     |
| China                      | 4/119 (3.4)                                                          | 2/119 (1.7)                                                                | 4.01 (0.44 to 36.73)       | 3.3      | .22      |                                     |
| Overall                    | 54/1561 (3.5)                                                        | 85/2502 (3.4)                                                              | 1.16 (0.78 to 1.74)        | 100.0    | .46      | .19                                 |
| <b>HPV16 E6 and E7‡</b>    |                                                                      |                                                                            |                            |          |          |                                     |
| South Africa               | 2/697 (0.3)                                                          | 0/1110 (0.0)                                                               | undefined                  | n/a      |          |                                     |
| Australia                  | 1/211 (0.5)                                                          | 0/424 (0.0)                                                                | undefined                  | n/a      |          |                                     |
| Central and Eastern Europe | 0/157 (0.0)                                                          | 1/314 (0.3)                                                                | undefined                  | n/a      |          |                                     |
| Brazil                     | 1/157 (0.6)                                                          | 1/314 (0.3)                                                                | 10.84 (0.61 to 194.12)     | n/a      | .11      |                                     |
| Iran                       | 0/220 (0.0)                                                          | 0/221 (0.0)                                                                | undefined                  | n/a      |          |                                     |
| China                      | 0/119 (0.0)                                                          | 0/119 (0.0)                                                                | undefined                  | n/a      |          |                                     |
| Overall                    | 4/1561 (0.3)                                                         | 2/2502 (0.1)                                                               | 5.57 (0.90 to 34.35)       | 100.0    | .064     | n/a                                 |
| <b>HPV31 L1</b>            |                                                                      |                                                                            |                            |          |          |                                     |
| South Africa               | 70/697 (10.0)                                                        | 127/1110 (11.4)                                                            | 0.92 (0.66 to 1.29)        | 58.0     | .64      |                                     |

|                            |                |                |                      |       |     |     |
|----------------------------|----------------|----------------|----------------------|-------|-----|-----|
| Australia                  | 9/211 (4.3)    | 32/424 (7.6)   | 0.82 (0.36 to 1.87)  | 9.7   | .64 |     |
| Central and Eastern Europe | 5/157 (3.2)    | 9/314 (2.9)    | 2.54 (0.57 to 11.26) | 2.9   | .22 |     |
| Brazil                     | 14/157 (8.9)   | 32/314 (10.2)  | 1.09 (0.47 to 2.48)  | 9.5   | .85 |     |
| Iran                       | 29/220 (13.2)  | 26/221 (11.8)  | 1.22 (0.64 to 2.34)  | 15.6  | .54 |     |
| China                      | 5/119 (4.2)    | 11/119 (9.2)   | 0.49 (0.14 to 1.71)  | 4.2   | .27 |     |
| Overall                    | 132/1561 (8.5) | 237/2502 (9.5) | 0.97 (0.75 to 1.25)  | 100.0 | .82 | .62 |

#### HPV31 E6‡

|                            |               |               |                      |       |     |     |
|----------------------------|---------------|---------------|----------------------|-------|-----|-----|
| South Africa               | 14/697 (2.0)  | 20/1110 (1.8) | 1.32 (0.62 to 2.82)  | n/a   | .47 |     |
| Australia                  | 2/211 (0.9)   | 4/424 (0.9)   | 1.27 (0.21 to 7.84)  | n/a   | .79 |     |
| Central and Eastern Europe | 2/157 (1.3)   | 0/314 (0.0)   | undefined            | n/a   |     |     |
| Brazil                     | 1/157 (0.6)   | 5/314 (1.6)   | 0.46 (0.04 to 5.33)  | n/a   | .54 |     |
| Iran                       | 2/220 (0.9)   | 4/221 (1.8)   | 0.52 (0.07 to 3.91)  | n/a   | .53 |     |
| China                      | 1/119 (0.8)   | 1/119 (0.8)   | 3.98 (0.19 to 84.43) | n/a   | .38 |     |
| Overall                    | 22/1561 (1.4) | 34/2502 (1.4) | 1.18 (0.66 to 2.10)  | 100.0 | .58 | n/a |

#### HPV33 L1

|                            |                |                 |                     |       |      |     |
|----------------------------|----------------|-----------------|---------------------|-------|------|-----|
| South Africa               | 77/697 (11.1)  | 114/1110 (10.3) | 1.27 (0.91 to 1.78) | 59.7  | .16  |     |
| Australia                  | 14/211 (6.6)   | 20/424 (4.7)    | 1.86 (0.86 to 4.04) | 11.4  | .11  |     |
| Central and Eastern Europe | 4/157 (2.5)    | 8/314 (2.5)     | 2.03 (0.47 to 8.84) | 3.1   | .35  |     |
| Brazil                     | 11/157 (7.0)   | 21/314 (6.7)    | 0.90 (0.35 to 2.31) | 7.6   | .82  |     |
| Iran                       | 24/220 (10.9)  | 20/221 (9.1)    | 1.45 (0.70 to 3.01) | 12.8  | .31  |     |
| China                      | 6/119 (5.0)    | 8/119 (6.7)     | 0.80 (0.26 to 2.47) | 5.4   | .70  |     |
| Overall                    | 136/1561 (8.7) | 191/2502 (7.6)  | 1.30 (1.00 to 1.69) | 100.0 | .047 | .76 |

#### HPV33 E6‡

|                            |              |              |                      |       |      |     |
|----------------------------|--------------|--------------|----------------------|-------|------|-----|
| South Africa               | 5/697 (0.7)  | 3/1110 (0.3) | 3.29 (0.75 to 14.48) | n/a   | .12  |     |
| Australia                  | 2/211 (0.9)  | 0/424 (0.0)  | undefined            | n/a   |      |     |
| Central and Eastern Europe | 0/157 (0.0)  | 1/314 (0.3)  | undefined            | n/a   |      |     |
| Brazil                     | 1/157 (0.6)  | 1/314 (0.3)  | 1.45 (0.07 to 28.33) | n/a   | .81  |     |
| Iran                       | 0/220 (0.0)  | 0/221 (0.0)  | undefined            | n/a   |      |     |
| China                      | 0/119 (0.0)  | 0/119 (0.0)  | undefined            | n/a   |      |     |
| Overall                    | 8/1561 (0.5) | 5/2502 (0.2) | 2.76 (0.86 to 8.82)  | 100.0 | .087 | n/a |

#### HPV35 L1

|                            |                |                 |                     |       |     |     |
|----------------------------|----------------|-----------------|---------------------|-------|-----|-----|
| South Africa               | 77/697 (11.1)  | 143/1110 (12.9) | 0.91 (0.66 to 1.25) | 57.9  | .56 |     |
| Australia                  | 10/211 (4.7)   | 25/424 (5.9)    | 1.10 (0.49 to 2.46) | 9.1   | .81 |     |
| Central and Eastern Europe | 9/157 (5.7)    | 16/314 (5.1)    | 1.05 (0.34 to 3.26) | 4.6   | .93 |     |
| Brazil                     | 14/157 (8.9)   | 39/314 (12.4)   | 1.10 (0.50 to 2.41) | 9.6   | .81 |     |
| Iran                       | 23/220 (10.4)  | 24/221 (10.9)   | 0.97 (0.50 to 1.88) | 13.6  | .93 |     |
| China                      | 9/119 (7.6)    | 9/119 (7.6)     | 1.14 (0.40 to 3.28) | 5.3   | .81 |     |
| Overall                    | 142/1561 (9.1) | 256/2502 (10.2) | 0.97 (0.76 to 1.23) | 100.0 | .80 | .99 |

#### HPV35 E6‡

|                            |               |               |                      |       |     |     |
|----------------------------|---------------|---------------|----------------------|-------|-----|-----|
| South Africa               | 11/697 (1.6)  | 11/1110 (1.0) | 1.22 (0.50 to 2.95)  | n/a   | .66 |     |
| Australia                  | 4/211 (1.9)   | 1/424 (0.2)   | 4.38 (0.45 to 43.01) | n/a   | .20 |     |
| Central and Eastern Europe | 1/157 (0.6)   | 2/314 (0.6)   | 4.25 (0.20 to 92.23) | n/a   | .36 |     |
| Brazil                     | 1/157 (0.6)   | 0/314 (0.0)   | undefined            | n/a   |     |     |
| Iran                       | 1/220 (0.4)   | 1/221 (0.4)   | 0.86 (0.03 to 28.58) | n/a   | .93 |     |
| China                      | 0/119 (0.0)   | 1/119 (0.8)   | undefined            | n/a   |     |     |
| Overall                    | 18/1561 (1.1) | 16/2502 (0.6) | 1.49 (0.73 to 3.05)  | 100.0 | .27 | n/a |

**HPV52 L1**

|                            |                |                 |                     |       |     |     |
|----------------------------|----------------|-----------------|---------------------|-------|-----|-----|
| South Africa               | 77/697 (11.1)  | 130/1110 (11.7) | 1.01 (0.73 to 1.40) | 60.8  | .96 |     |
| Australia                  | 8/211 (3.8)    | 12/424 (2.8)    | 1.59 (0.58 to 4.33) | 6.5   | .37 |     |
| Central and Eastern Europe | 2/157 (1.3)    | 11/314 (3.5)    | 0.57 (0.10 to 3.42) | 2.0   | .54 |     |
| Brazil                     | 13/157 (8.3)   | 27/314 (8.6)    | 1.68 (0.69 to 4.06) | 8.3   | .25 |     |
| Iran                       | 31/220 (14.1)  | 26/221 (11.8)   | 1.40 (0.75 to 2.64) | 16.4  | .29 |     |
| China                      | 6/119 (5.0)    | 11/119 (9.2)    | 0.58 (0.20 to 1.64) | 6.0   | .30 |     |
| Overall                    | 137/1561 (8.8) | 217/2502 (8.7)  | 1.09 (0.85 to 1.41) | 100.0 | .49 | .52 |

**HPV52 E6‡**

|                            |              |              |                      |       |      |     |
|----------------------------|--------------|--------------|----------------------|-------|------|-----|
| South Africa               | 4/697 (0.6)  | 2/1110 (0.2) | 3.63 (0.61 to 21.49) | n/a   | .16  |     |
| Australia                  | 0/211 (0.0)  | 1/424 (0.2)  | undefined            | n/a   |      |     |
| Central and Eastern Europe | 1/157 (0.6)  | 0/314 (0.0)  | undefined            | n/a   |      |     |
| Brazil                     | 0/157 (0.0)  | 0/314 (0.0)  | undefined            | n/a   |      |     |
| Iran                       | 1/220 (0.4)  | 0/221 (0.0)  | undefined            | n/a   |      |     |
| China                      | 0/119 (0.0)  | 0/119 (0.0)  | undefined            | n/a   |      |     |
| Overall                    | 6/1561 (0.4) | 3/2502 (0.1) | 3.92 (0.92 to 16.74) | 100.0 | .065 | n/a |

**HPV58 L1**

|                            |                |                |                      |       |      |     |
|----------------------------|----------------|----------------|----------------------|-------|------|-----|
| South Africa               | 61/697 (8.8)   | 106/1110 (9.6) | 1.06 (0.74 to 1.51)  | 52.0  | .77  |     |
| Australia                  | 10/211 (4.7)   | 9/424 (2.1)    | 2.71 (1.02 to 7.19)  | 7.1   | .045 |     |
| Central and Eastern Europe | 6/157 (3.8)    | 9/314 (2.9)    | 2.25 (0.46 to 10.94) | 2.7   | .32  |     |
| Brazil                     | 16/157 (10.2)  | 30/314 (9.6)   | 0.95 (0.44 to 2.07)  | 11.2  | .90  |     |
| Iran                       | 27/220 (12.3)  | 29/221 (13.1)  | 1.14 (0.60 to 2.14)  | 16.7  | .70  |     |
| China                      | 13/119 (10.9)  | 13/119 (10.9)  | 0.92 (0.41 to 2.08)  | 10.2  | .85  |     |
| Overall                    | 133/1561 (8.5) | 196/2502 (7.8) | 1.14 (0.88 to 1.47)  | 100.0 | .33  | .50 |

**HPV58 E6‡**

|                            |               |               |                        |       |      |     |
|----------------------------|---------------|---------------|------------------------|-------|------|-----|
| South Africa               | 6/697 (0.9)   | 7/1110 (0.6)  | 0.92 (0.29 to 2.92)    | n/a   | .89  |     |
| Australia                  | 1/211 (0.5)   | 4/424 (0.9)   | 0.48 (0.04 to 5.60)    | n/a   | .56  |     |
| Central and Eastern Europe | 1/157 (0.6)   | 1/314 (0.3)   | 18.70 (0.98 to 355.59) | n/a   | .051 |     |
| Brazil                     | 1/157 (0.6)   | 0/314 (0.0)   | undefined              | n/a   |      |     |
| Iran                       | 1/220 (0.4)   | 0/221 (0.0)   | undefined              | n/a   |      |     |
| China                      | 0/119 (0.0)   | 0/119 (0.0)   | undefined              | n/a   |      |     |
| Overall                    | 10/1561 (0.6) | 12/2502 (0.5) | 1.23 (0.50 to 3.05)    | 100.0 | .65  | n/a |

**HPV18 L1**

|                            |                 |                 |                     |       |       |       |
|----------------------------|-----------------|-----------------|---------------------|-------|-------|-------|
| South Africa               | 288/697 (41.3)  | 390/1110 (35.1) | 1.39 (1.12 to 1.73) | 23.3  | .0033 |       |
| Australia                  | 59/211 (28.0)   | 66/424 (15.6)   | 2.48 (1.60 to 3.86) | 17.3  | <.001 |       |
| Central and Eastern Europe | 32/157 (20.4)   | 70/314 (22.3)   | 1.26 (0.71 to 2.24) | 14.1  | .42   |       |
| Brazil                     | 62/157 (39.5)   | 111/314 (35.3)  | 1.27 (0.78 to 2.07) | 16.0  | .34   |       |
| Iran                       | 79/220 (35.9)   | 75/221 (33.9)   | 1.07 (0.69 to 1.66) | 17.3  | .77   |       |
| China                      | 26/119 (21.9)   | 37/119 (31.1)   | 0.55 (0.28 to 1.07) | 11.9  | .080  |       |
| Overall                    | 546/1561 (35.0) | 749/2502 (29.9) | 1.28 (0.93 to 1.75) | 100.0 | .13   | .0085 |

**HPV18 E6‡**

|                            |              |               |                      |     |     |  |
|----------------------------|--------------|---------------|----------------------|-----|-----|--|
| South Africa               | 14/697 (2.0) | 16/1110 (1.4) | 1.50 (0.70 to 3.25)  | n/a | .30 |  |
| Australia                  | 3/211 (1.4)  | 3/424 (0.7)   | 2.84 (0.47 to 17.15) | n/a | .25 |  |
| Central and Eastern Europe | 2/157 (1.3)  | 1/314 (0.3)   | 6.55 (0.52 to 83.36) | n/a | .15 |  |
| Brazil                     | 3/157 (1.9)  | 7/314 (2.2)   | 0.31 (0.05 to 1.77)  | n/a | .19 |  |
| Iran                       | 4/220 (1.8)  | 4/221 (1.8)   | 0.99 (0.23 to 4.31)  | n/a | .99 |  |
| China                      | 0/119 (0.0)  | 1/119 (0.8)   | undefined            | n/a |     |  |

|                            |                 |                 |                      |       |       |     |
|----------------------------|-----------------|-----------------|----------------------|-------|-------|-----|
| Overall                    | 26/1561 (1.7)   | 32/2502 (1.3)   | 1.24 (0.70 to 2.18)  | 100.0 | .46   | n/a |
| <b>HPV18 E7‡</b>           |                 |                 |                      |       |       |     |
| South Africa               | 9/697 (1.3)     | 10/1110 (0.9)   | 1.21 (0.46 to 3.19)  | n/a   | .71   |     |
| Australia                  | 0/211 (0.0)     | 0/424 (0.0)     | undefined            | n/a   |       |     |
| Central and Eastern Europe | 1/157 (0.6)     | 4/314 (1.3)     | 0.38 (0.03 to 4.29)  | n/a   | .43   |     |
| Brazil                     | 2/157 (1.3)     | 0/314 (0.0)     | undefined            | n/a   |       |     |
| Iran                       | 1/220 (0.4)     | 0/221 (0.0)     | undefined            | n/a   |       |     |
| China                      | 0/119 (0.0)     | 0/119 (0.0)     | undefined            | n/a   |       |     |
| Overall                    | 13/1561 (0.8)   | 14/2502 (0.6)   | 1.31 (0.58 to 2.93)  | 100.0 | .52   | n/a |
| <b>HPV18 E6 and/or E7‡</b> |                 |                 |                      |       |       |     |
| South Africa               | 21/697 (3.0)    | 25/1110 (2.3)   | 1.29 (0.69 to 2.43)  | n/a   | .42   |     |
| Australia                  | 3/211 (1.4)     | 3/424 (0.7)     | 2.84 (0.47 to 17.15) | n/a   | .25   |     |
| Central and Eastern Europe | 3/157 (1.9)     | 5/314 (1.6)     | 1.34 (0.27 to 6.72)  | n/a   | .72   |     |
| Brazil                     | 5/157 (3.2)     | 7/314 (2.2)     | 1.03 (0.22 to 4.72)  | n/a   | .97   |     |
| Iran                       | 5/220 (2.3)     | 4/221 (1.8)     | 1.07 (0.26 to 4.48)  | n/a   | .92   |     |
| China                      | 0/119 (0.0)     | 1/119 (0.8)     | undefined            | n/a   |       |     |
| Overall                    | 37/1561 (2.4)   | 45/2502 (1.8)   | 1.21 (0.75 to 1.94)  | 100.0 | 0.43  | n/a |
| <b>HPV18 E6 and E7‡</b>    |                 |                 |                      |       |       |     |
| South Africa               | 2/697 (0.3)     | 1/1110 (0.1)    | 3.52 (0.31 to 39.71) | n/a   | .31   |     |
| Australia                  | 0/211 (0.0)     | 0/424 (0.0)     | undefined            | n/a   |       |     |
| Central and Eastern Europe | 0/157 (0.0)     | 0/314 (0.0)     | undefined            | n/a   |       |     |
| Brazil                     | 0/157 (0.0)     | 0/314 (0.0)     | undefined            | n/a   |       |     |
| Iran                       | 0/220 (0.0)     | 0/221 (0.0)     | undefined            | n/a   |       |     |
| China                      | 0/119 (0.0)     | 0/119 (0.0)     | undefined            | n/a   |       |     |
| Overall                    | 2/1561 (0.1)    | 1/2502 (0.0)    | 3.52 (0.31 to 39.48) | 100.0 | .31   | n/a |
| <b>HPV45 L1</b>            |                 |                 |                      |       |       |     |
| South Africa               | 109/697 (15.6)  | 195/1110 (17.6) | 0.90 (0.68 to 1.19)  | 60.0  | .44   |     |
| Australia                  | 7/211 (3.3)     | 16/424 (3.8)    | 1.14 (0.43 to 3.02)  | 5.0   | .79   |     |
| Central and Eastern Europe | 7/157 (4.5)     | 21/314 (6.7)    | 1.08 (0.37 to 3.18)  | 4.1   | .89   |     |
| Brazil                     | 16/157 (10.2)   | 45/314 (14.3)   | 0.79 (0.35 to 1.76)  | 7.2   | .56   |     |
| Iran                       | 42/220 (19.1)   | 40/221 (18.1)   | 1.08 (0.63 to 1.84)  | 16.6  | .78   |     |
| China                      | 13/119 (10.9)   | 18/119 (15.1)   | 0.69 (0.31 to 1.56)  | 7.1   | .37   |     |
| Overall                    | 194/1561 (12.4) | 335/2502 (13.4) | 0.92 (0.74 to 1.14)  | 100.0 | .43   | .94 |
| <b>HPV45 E6‡</b>           |                 |                 |                      |       |       |     |
| South Africa               | 7/697 (1.0)     | 5/1110 (0.4)    | 2.97 (0.87 to 10.11) | n/a   | .081  |     |
| Australia                  | 1/211 (0.5)     | 4/424 (0.9)     | 1.27 (0.13 to 12.25) | n/a   | .83   |     |
| Central and Eastern Europe | 1/157 (0.6)     | 0/314 (0.0)     | undefined            | n/a   |       |     |
| Brazil                     | 1/157 (0.6)     | 4/314 (1.3)     | 0.48 (0.04 to 5.45)  | n/a   | .55   |     |
| Iran                       | 1/220 (0.4)     | 1/221 (0.4)     | 1.39 (0.08 to 23.96) | n/a   | .82   |     |
| China                      | 1/119 (0.8)     | 1/119 (0.8)     | 1.01 (0.06 to 17.20) | n/a   | 1.00  |     |
| Overall                    | 12/1561 (0.8)   | 15/2502 (0.6)   | 1.64 (0.72 to 3.70)  | 100.0 | .24   | n/a |
| <b>HPV6 L1</b>             |                 |                 |                      |       |       |     |
| South Africa               | 380/697 (54.5)  | 508/1110 (45.8) | 1.33 (1.08 to 1.63)  | 54.1  | .007  |     |
| Australia                  | 41/211 (19.4)   | 71/424 (16.8)   | 1.01 (0.62 to 1.63)  | 10.0  | .98   |     |
| Central and Eastern Europe | 50/157 (31.9)   | 76/314 (24.2)   | 1.18 (0.69 to 2.04)  | 7.9   | .54   |     |
| Brazil                     | 75/157 (47.8)   | 105/314 (33.4)  | 2.09 (1.24 to 3.51)  | 8.6   | .0054 |     |

|                            |                 |                 |                       |       |       |      |
|----------------------------|-----------------|-----------------|-----------------------|-------|-------|------|
| Iran                       | 100/220 (45.5)  | 100/221 (45.3)  | 0.98 (0.64 to 1.49)   | 13.0  | .91   |      |
| China                      | 42/119 (35.3)   | 59/119 (49.6)   | 0.65 (0.36 to 1.17)   | 6.5   | .15   |      |
| Overall                    | 688/1561 (44.1) | 919/2502 (36.7) | 1.22 (1.05 to 1.42)   | 100.0 | .010  | .054 |
| <b>HPV6 E6‡</b>            |                 |                 |                       |       |       |      |
| South Africa               | 24/697 (3.4)    | 16/1110 (1.4)   | 2.64 (1.34 to 5.21)   | n/a   | .0051 |      |
| Australia                  | 3/211 (1.4)     | 2/424 (0.5)     | 3.49 (0.53 to 22.96)  | n/a   | .19   |      |
| Central and Eastern Europe | 0/157 (0.0)     | 2/314 (0.6)     | undefined             | n/a   |       |      |
| Brazil                     | 1/157 (0.6)     | 5/314 (1.6)     | 0.39 (0.04 to 3.85)   | n/a   | .42   |      |
| Iran                       | 8/220 (3.6)     | 1/221 (0.4)     | 10.55 (1.15 to 97.24) | n/a   | .038  |      |
| China                      | 5/119 (4.2)     | 0/119 (0.0)     | undefined             | n/a   |       |      |
| Overall                    | 41/1561 (2.6)   | 26/2502 (1.0)   | 2.53 (1.51 to 4.25)   | 100.0 | <.001 | n/a  |
| <b>HPV6 E7‡</b>            |                 |                 |                       |       |       |      |
| South Africa               | 1/697 (0.1)     | 2/1110 (0.2)    | 0.50 (0.04 to 6.16)   | n/a   | .59   |      |
| Australia                  | 0/211 (0.0)     | 0/424 (0.0)     | undefined             | n/a   |       |      |
| Central and Eastern Europe | 0/157 (0.0)     | 0/314 (0.0)     | undefined             | n/a   |       |      |
| Brazil                     | 0/157 (0.0)     | 1/314 (0.3)     | undefined             | n/a   |       |      |
| Iran                       | 0/220 (0.0)     | 0/221 (0.0)     | undefined             | n/a   |       |      |
| China                      | 0/119 (0.0)     | 0/119 (0.0)     | undefined             | n/a   |       |      |
| Overall                    | 1/1561 (0.1)    | 3/2502 (0.1)    | 0.40 (0.04 to 4.09)   | 100.0 | .44   | n/a  |
| <b>HPV11 L1</b>            |                 |                 |                       |       |       |      |
| South Africa               | 213/697 (30.6)  | 280/1110 (25.2) | 1.23 (0.98 to 1.55)   | 61.0  | .075  |      |
| Australia                  | 28/211 (13.3)   | 24/424 (5.7)    | 2.49 (1.31 to 4.72)   | 7.8   | .0052 |      |
| Central and Eastern Europe | 17/157 (10.8)   | 34/314 (10.8)   | 1.00 (0.45 to 2.23)   | 5.0   | .99   |      |
| Brazil                     | 39/157 (24.8)   | 58/314 (18.5)   | 1.63 (0.89 to 2.96)   | 8.9   | .11   |      |
| Iran                       | 53/220 (24.1)   | 43/221 (19.5)   | 1.55 (0.91 to 2.63)   | 11.3  | .11   |      |
| China                      | 15/119 (12.6)   | 23/119 (19.3)   | 0.65 (0.31 to 1.35)   | 5.9   | .25   |      |
| Overall                    | 365/1561 (23.4) | 462/2502 (18.5) | 1.30 (1.09 to 1.56)   | 100.0 | .0036 | .11  |
| <b>HPV11 E6‡</b>           |                 |                 |                       |       |       |      |
| South Africa               | 9/697 (1.3)     | 6/1110 (0.5)    | 2.09 (0.70 to 6.21)   | n/a   | .18   |      |
| Australia                  | 3/211 (1.4)     | 2/424 (0.5)     | 2.62 (0.40 to 17.42)  | n/a   | .32   |      |
| Central and Eastern Europe | 0/157 (0.0)     | 0/314 (0.0)     | undefined             | n/a   |       |      |
| Brazil                     | 1/157 (0.6)     | 2/314 (0.6)     | 1.19 (0.06 to 24.46)  | n/a   | .91   |      |
| Iran                       | 0/220 (0.0)     | 1/221 (0.4)     | undefined             | n/a   |       |      |
| China                      | 2/119 (1.7)     | 0/119 (0.0)     | undefined             | n/a   |       |      |
| Overall                    | 15/1561 (1.0)   | 11/2502 (0.4)   | 1.99 (0.89 to 4.44)   | 100.0 | .093  | n/a  |
| <b>HPV11 E7‡</b>           |                 |                 |                       |       |       |      |
| South Africa               | 4/697 (0.6)     | 9/1110 (0.8)    | 0.51 (0.14 to 1.88)   | n/a   | .31   |      |
| Australia                  | 1/211 (0.5)     | 3/424 (0.7)     | 0.96 (0.09 to 9.77)   | n/a   | .97   |      |
| Central and Eastern Europe | 0/157 (0.0)     | 1/314 (0.3)     | undefined             | n/a   |       |      |
| Brazil                     | 2/157 (1.3)     | 3/314 (1.0)     | 1.20 (0.14 to 9.94)   | n/a   | .87   |      |
| Iran                       | 0/220 (0.0)     | 1/221 (0.4)     | undefined             | n/a   |       |      |
| China                      | 0/119 (0.0)     | 0/119 (0.0)     | undefined             | n/a   |       |      |
| Overall                    | 7/1561 (0.4)    | 17/2502 (0.7)   | 0.55 (0.22 to 1.40)   | 100.0 | .21   | n/a  |
| <b>HPV1 L1</b>             |                 |                 |                       |       |       |      |
| South Africa               | 83/697 (11.9)   | 147/1110 (13.2) | 0.94 (0.69 to 1.29)   | 38.9  | .71   |      |
| Australia                  | 46/211 (21.8)   | 87/424 (20.5)   | 0.99 (0.63 to 1.54)   | 19.0  | .96   |      |

|                            |                 |                 |                     |       |     |     |
|----------------------------|-----------------|-----------------|---------------------|-------|-----|-----|
| Central and Eastern Europe | 37/157 (23.6)   | 49/314 (15.6)   | 1.58 (0.83 to 2.99) | 9.2   | .16 |     |
| Brazil                     | 21/157 (13.4)   | 50/314 (15.9)   | 1.15 (0.60 to 2.20) | 8.9   | .67 |     |
| Iran                       | 65/220 (29.5)   | 58/221 (26.2)   | 1.17 (0.75 to 1.85) | 18.3  | .49 |     |
| China                      | 16/119 (13.4)   | 15/119 (12.6)   | 1.23 (0.55 to 2.76) | 5.7   | .62 |     |
| Overall                    | 268/1561 (17.2) | 406/2502 (16.2) | 1.07 (0.88 to 1.30) | 100.0 | .48 | .78 |

#### HPV4 L1

|                            |                 |                 |                     |       |     |     |
|----------------------------|-----------------|-----------------|---------------------|-------|-----|-----|
| South Africa               | 128/697 (18.4)  | 208/1110 (18.7) | 1.05 (0.81 to 1.37) | 42.3  | .70 |     |
| Australia                  | 61/211 (28.9)   | 130/424 (30.7)  | 1.09 (0.73 to 1.63) | 18.6  | .68 |     |
| Central and Eastern Europe | 33/157 (21.0)   | 75/314 (23.9)   | 0.86 (0.47 to 1.57) | 8.3   | .62 |     |
| Brazil                     | 36/157 (22.9)   | 89/314 (28.3)   | 0.94 (0.54 to 1.64) | 9.6   | .83 |     |
| Iran                       | 104/220 (47.3)  | 88/221 (39.8)   | 1.35 (0.88 to 2.07) | 16.3  | .17 |     |
| China                      | 17/119 (14.3)   | 22/119 (18.5)   | 0.88 (0.40 to 1.95) | 4.8   | .76 |     |
| Overall                    | 379/1561 (24.3) | 612/2502 (24.5) | 1.06 (0.89 to 1.26) | 100.0 | .48 | .84 |

#### HPV49 L1

|                            |                 |                 |                     |       |      |     |
|----------------------------|-----------------|-----------------|---------------------|-------|------|-----|
| South Africa               | 155/697 (22.2)  | 234/1110 (21.1) | 1.11 (0.87 to 1.43) | 45.5  | .39  |     |
| Australia                  | 59/211 (28.0)   | 97/424 (22.9)   | 1.27 (0.83 to 1.92) | 16.5  | .27  |     |
| Central and Eastern Europe | 28/157 (17.8)   | 57/314 (18.1)   | 0.87 (0.44 to 1.73) | 6.1   | .70  |     |
| Brazil                     | 39/157 (24.8)   | 69/314 (22.0)   | 1.55 (0.90 to 2.69) | 9.5   | .12  |     |
| Iran                       | 115/220 (52.3)  | 97/221 (43.9)   | 1.33 (0.87 to 2.03) | 16.1  | .18  |     |
| China                      | 31/119 (26.0)   | 32/119 (26.9)   | 0.96 (0.50 to 1.88) | 6.4   | .92  |     |
| Overall                    | 427/1561 (27.4) | 586/2502 (23.4) | 1.18 (1.00 to 1.40) | 100.0 | .055 | .75 |

#### HPV77 L1

|                            |                 |                 |                     |       |     |     |
|----------------------------|-----------------|-----------------|---------------------|-------|-----|-----|
| South Africa               | 78/697 (11.2)   | 124/1110 (11.2) | 1.15 (0.83 to 1.60) | 48.0  | .40 |     |
| Australia                  | 15/211 (7.1)    | 32/424 (7.6)    | 1.10 (0.55 to 2.18) | 11.1  | .79 |     |
| Central and Eastern Europe | 7/157 (4.5)     | 28/314 (8.9)    | 0.51 (0.18 to 1.45) | 4.8   | .21 |     |
| Brazil                     | 22/157 (14.0)   | 48/314 (15.3)   | 1.07 (0.56 to 2.01) | 12.8  | .85 |     |
| Iran                       | 43/220 (19.5)   | 37/221 (16.7)   | 1.30 (0.76 to 2.24) | 17.5  | .34 |     |
| China                      | 11/119 (9.2)    | 12/119 (10.1)   | 0.98 (0.38 to 2.53) | 5.8   | .97 |     |
| Overall                    | 176/1561 (11.3) | 281/2502 (11.2) | 1.11 (0.88 to 1.39) | 100.0 | .39 | .77 |

#### p53

|                            |                 |                |                        |       |       |       |
|----------------------------|-----------------|----------------|------------------------|-------|-------|-------|
| South Africa               | 112/697 (16.1)  | 74/1110 (6.7)  | 3.01 (2.14 to 4.22)    | 23.4  | <.001 |       |
| Australia                  | 27/211 (12.8)   | 2/424 (0.5)    | 40.64 (9.26 to 178.38) | 12.6  | <.001 |       |
| Central and Eastern Europe | 29/157 (18.5)   | 5/314 (1.6)    | 31.42 (6.79 to 145.35) | 12.2  | <.001 |       |
| Brazil                     | 33/157 (21.0)   | 16/314 (5.1)   | 4.93 (2.33 to 10.45)   | 19.7  | <.001 |       |
| Iran                       | 45/220 (20.5)   | 11/221 (5.0)   | 5.75 (2.54 to 12.99)   | 19.1  | <.001 |       |
| China                      | 20/119 (16.8)   | 3/119 (2.5)    | 10.06 (2.41 to 41.94)  | 13.0  | .0015 |       |
| Overall                    | 266/1561 (17.0) | 111/2502 (4.4) | 8.10 (3.83 to 17.17)   | 100.0 | <.001 | <.001 |

#### JCV VP1

|                            |                  |                  |                     |       |      |     |
|----------------------------|------------------|------------------|---------------------|-------|------|-----|
| South Africa               | 486/697 (69.7)   | 809/1110 (72.9)  | 0.83 (0.66 to 1.04) | 53.6  | .097 |     |
| Australia                  | 133/211 (63.0)   | 287/424 (67.7)   | 0.88 (0.60 to 1.29) | 18.3  | .52  |     |
| Central and Eastern Europe | 116/157 (73.9)   | 239/314 (76.1)   | 0.53 (0.29 to 0.96) | 7.5   | .036 |     |
| Brazil                     | 125/157 (79.6)   | 254/314 (80.9)   | 1.07 (0.59 to 1.94) | 7.6   | .82  |     |
| Iran                       | 178/220 (80.9)   | 178/221 (80.5)   | 1.04 (0.60 to 1.82) | 8.6   | .88  |     |
| China                      | 101/119 (84.9)   | 98/119 (82.3)    | 1.35 (0.62 to 2.91) | 4.5   | .45  |     |
| Overall                    | 1139/1561 (73.0) | 1865/2502 (74.5) | 0.86 (0.73 to 1.01) | 100.0 | .072 | .42 |

#### MCV VP1

|                            |                  |                  |                     |       |     |     |
|----------------------------|------------------|------------------|---------------------|-------|-----|-----|
| South Africa               | 543/697 (77.9)   | 913/1110 (82.3)  | 0.81 (0.63 to 1.05) | 53.0  | .11 |     |
| Australia                  | 151/211 (71.6)   | 326/424 (76.9)   | 0.85 (0.56 to 1.29) | 20.1  | .44 |     |
| Central and Eastern Europe | 131/157 (83.4)   | 277/314 (88.2)   | 1.36 (0.63 to 2.91) | 6.0   | .43 |     |
| Brazil                     | 135/157 (86.0)   | 261/314 (83.1)   | 1.51 (0.80 to 2.85) | 8.7   | .20 |     |
| Iran                       | 196/220 (89.1)   | 201/221 (90.9)   | 0.77 (0.39 to 1.50) | 7.8   | .44 |     |
| China                      | 105/119 (88.2)   | 110/119 (92.4)   | 0.67 (0.27 to 1.64) | 4.3   | .38 |     |
| Overall                    | 1261/1561 (80.8) | 2088/2502 (83.4) | 0.88 (0.73 to 1.06) | 100.0 | .18 | .41 |

\* Linear mixed effects approach was used for pooling marker data except where indicated. All *P* values are two-sided. OR = odds ratio; CI = confidence interval; HPV = human papillomavirus; n/a = not applicable; JCV = JC virus; MCV = Merkel cell virus.

†  $P_{\text{heterogeneity}} < .05$  indicates statistically significant heterogeneity among studies.

‡ Joint fixed effects approach used for pooling marker data.
